# Supplementary material
Source: ML conference proceedings conference paper supplement (https://proceedings.neurips.cc/paper_files/paper/2022/hash/38c5feed4b72c96f6cf925ccc9832ecf-Abstract.html)
Supplement: Supplementary file 1 [file 38c5feed4b72c96f6cf925ccc9832ecf-Supplemental-Conference.zip]

Archive with 25 entries (21 files):
- NeurIPS2022_paper_7592_supp/
- NeurIPS2022_paper_7592_supp/.DS_Store
- __MACOSX/NeurIPS2022_paper_7592_supp/._.DS_Store
- NeurIPS2022_paper_7592_supp/NeurIPS_2022_paper_7592_final.pdf
- __MACOSX/NeurIPS2022_paper_7592_supp/._NeurIPS_2022_paper_7592_final.pdf
- NeurIPS2022_paper_7592_supp/code/
- __MACOSX/NeurIPS2022_paper_7592_supp/._code
- NeurIPS2022_paper_7592_supp/code/Credit/
- __MACOSX/NeurIPS2022_paper_7592_supp/code/._Credit
- NeurIPS2022_paper_7592_supp/code/.DS_Store
- __MACOSX/NeurIPS2022_paper_7592_supp/code/._.DS_Store
- NeurIPS2022_paper_7592_supp/code/Adult/
- __MACOSX/NeurIPS2022_paper_7592_supp/code/._Adult
- NeurIPS2022_paper_7592_supp/code/Credit/data_credit.csv
- __MACOSX/NeurIPS2022_paper_7592_supp/code/Credit/._data_credit.csv
- NeurIPS2022_paper_7592_supp/code/Credit/Credit_DP.py
- __MACOSX/NeurIPS2022_paper_7592_supp/code/Credit/._Credit_DP.py
- NeurIPS2022_paper_7592_supp/code/Credit/Credit_TPR.py
- __MACOSX/NeurIPS2022_paper_7592_supp/code/Credit/._Credit_TPR.py
- NeurIPS2022_paper_7592_supp/code/Adult/Adult_DP.py
- __MACOSX/NeurIPS2022_paper_7592_supp/code/Adult/._Adult_DP.py
- NeurIPS2022_paper_7592_supp/code/Adult/Adult_FPR.py
- __MACOSX/NeurIPS2022_paper_7592_supp/code/Adult/._Adult_FPR.py
- NeurIPS2022_paper_7592_supp/code/Adult/Adult_preprosessing.py
- __MACOSX/NeurIPS2022_paper_7592_supp/code/Adult/._Adult_preprosessing.py
