# Supplementary material
Source: ML conference proceedings conference paper supplement (https://proceedings.neurips.cc/paper_files/paper/2022/hash/38c5feed4b72c96f6cf925ccc9832ecf-Abstract.html)
Supplement: Supplementary file 1 [file 38c5feed4b72c96f6cf925ccc9832ecf-Supplemental-Conference.zip › NeurIPS2022_paper_7592_supp/code/Adult/Adult_preprosessing.py]

import numpy as np
import pandas as pd

def get_data_adult():
    CATEGORICAL_COLUMNS = [
        'workclass', 'education', 'marital_status', 'occupation', 'relationship',
        'race', 'gender', 'native_country'
    ]
    CONTINUOUS_COLUMNS = [
        'age', 'capital_gain', 'capital_loss', 'hours_per_week', 'education_num'
    ]
    COLUMNS = [
        'age', 'workclass', 'fnlwgt', 'education', 'education_num',
        'marital_status', 'occupation', 'relationship', 'race', 'gender',
        'capital_gain', 'capital_loss', 'hours_per_week', 'native_country',
        'income_bracket'
    ]
    LABEL_COLUMN = 'label'

    PROTECTED_COLUMNS = [
        'gender_Female', 'gender_Male', 'race_White', 'race_Black'
    ]

    train_df_raw = pd.read_csv("https://archive.ics.uci.edu/ml/machine-learning-databases/adult/adult.data", names=COLUMNS, skipinitialspace=True)
    test_df_raw = pd.read_csv("https://archive.ics.uci.edu/ml/machine-learning-databases/adult/adult.test", names=COLUMNS, skipinitialspace=True, skiprows=1)

    train_df_raw[LABEL_COLUMN] = (train_df_raw['income_bracket'].apply(lambda x: '>50K' in x)).astype(int)
    test_df_raw[LABEL_COLUMN] = (test_df_raw['income_bracket'].apply(lambda x: '>50K' in x)).astype(int)
    # Preprocessing Features
    pd.options.mode.chained_assignment = None  # default='warn'

    # Functions for preprocessing categorical and continuous columns.
    def binarize_categorical_columns(input_train_df, input_test_df, categorical_columns=[]):

        def fix_columns(input_train_df, input_test_df):
            test_df_missing_cols = set(input_train_df.columns) - set(input_test_df.columns)
            for c in test_df_missing_cols:
                input_test_df[c] = 0
                train_df_missing_cols = set(input_test_df.columns) - set(input_train_df.columns)
            for c in train_df_missing_cols:
                input_train_df[c] = 0
                input_train_df = input_train_df[input_test_df.columns]
            return input_train_df, input_test_df

        # Binarize categorical columns.
        binarized_train_df = pd.get_dummies(input_train_df, columns=categorical_columns)
        binarized_test_df = pd.get_dummies(input_test_df, columns=categorical_columns)
        # Make sure the train and test dataframes have the same binarized columns.
        fixed_train_df, fixed_test_df = fix_columns(binarized_train_df, binarized_test_df)
        return fixed_train_df, fixed_test_df

    def bucketize_continuous_column(input_train_df,
                                  input_test_df,
                                  continuous_column_name,
                                  num_quantiles=None,
                                  bins=None):
        assert (num_quantiles is None or bins is None)
        if num_quantiles is not None:
            train_quantized, bins_quantized = pd.qcut(
              input_train_df[continuous_column_name],
              num_quantiles,
              retbins=True,
              labels=False)
            input_train_df[continuous_column_name] = pd.cut(
              input_train_df[continuous_column_name], bins_quantized, labels=False)
            input_test_df[continuous_column_name] = pd.cut(
              input_test_df[continuous_column_name], bins_quantized, labels=False)
        elif bins is not None:
            input_train_df[continuous_column_name] = pd.cut(
              input_train_df[continuous_column_name], bins, labels=False)
            input_test_df[continuous_column_name] = pd.cut(
              input_test_df[continuous_column_name], bins, labels=False)

    # Filter out all columns except the ones specified.
    train_df = train_df_raw[CATEGORICAL_COLUMNS + CONTINUOUS_COLUMNS + [LABEL_COLUMN]]
    test_df = test_df_raw[CATEGORICAL_COLUMNS + CONTINUOUS_COLUMNS + [LABEL_COLUMN]]
    
    # Bucketize continuous columns.
    bucketize_continuous_column(train_df, test_df, 'age', num_quantiles=4)
    bucketize_continuous_column(train_df, test_df, 'capital_gain', bins=[-1, 1, 4000, 10000, 100000])
    bucketize_continuous_column(train_df, test_df, 'capital_loss', bins=[-1, 1, 1800, 1950, 4500])
    bucketize_continuous_column(train_df, test_df, 'hours_per_week', bins=[0, 39, 41, 50, 100])
    bucketize_continuous_column(train_df, test_df, 'education_num', bins=[0, 8, 9, 11, 16])
    train_df, test_df = binarize_categorical_columns(train_df, test_df, categorical_columns=CATEGORICAL_COLUMNS + CONTINUOUS_COLUMNS)

    full_df = train_df.append(test_df)
    full_df = full_df.drop(columns = ['race_Amer-Indian-Eskimo', 'race_Asian-Pac-Islander', 'race_Black', 'race_Other', 'gender_Female'])
    
    return full_df

full_df = get_data_adult()
